# Supplementary material for: Synthesis, structure, fluorescence and electrochemical properties of a new Zn(ii)–organic framework constructed by a tricarboxylic acid ligand
Source: Royal Society of Chemistry journal article supplement (doi:10.1039/c9nj02679g), 2019-01-01
Supplement: c9nj02679g1.pdf [file c9nj02679g1.pdf]

## Synthesis, structure, fluorescence and electrochemical properties of a new Zn(II)-organic framework constructed by tricarboxylic acid ligand

### X-ray Crystallography

Single-crystal X-ray diffraction data for **1** were recorded on an Oxford Gemini R Ultra diffractometer with graphite-monochromated Mo-K $\alpha$  radiation ( $\lambda = 0.71073 \text{ \AA}$ ) at 293 K. All the structures were solved by Direct Method of SHELXS-2018 and refined by full-matrix least-squares techniques using the SHELXL-2018 program within WINGX.<sup>1</sup> Non-hydrogen atoms were refined with anisotropic temperature parameters. The disordered atoms Zn3, O15 and O4W were split over two sites with a total occupancy of 1 for each pair of disordered atoms. All hydrogen atoms on carbon atoms were generated geometrically and refined using a riding model with  $d(\text{C-H}) = 0.93 \text{ \AA}$ ,  $U_{\text{iso}} = 1.2U_{\text{eq}}(\text{C})$  for aromatic. The detailed crystallographic data and structure refinement parameters of all compounds are summarized in Table 1. Selected bond distances and angles are given in the Table S1.

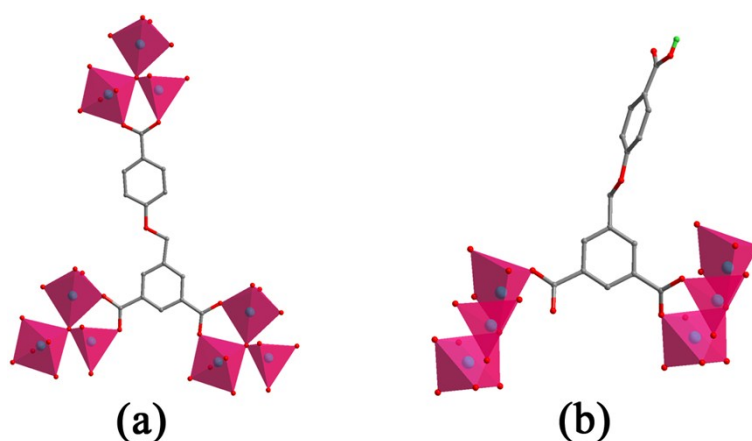

**Fig. S1** Diverse coordination modes of Zn(II) ion.

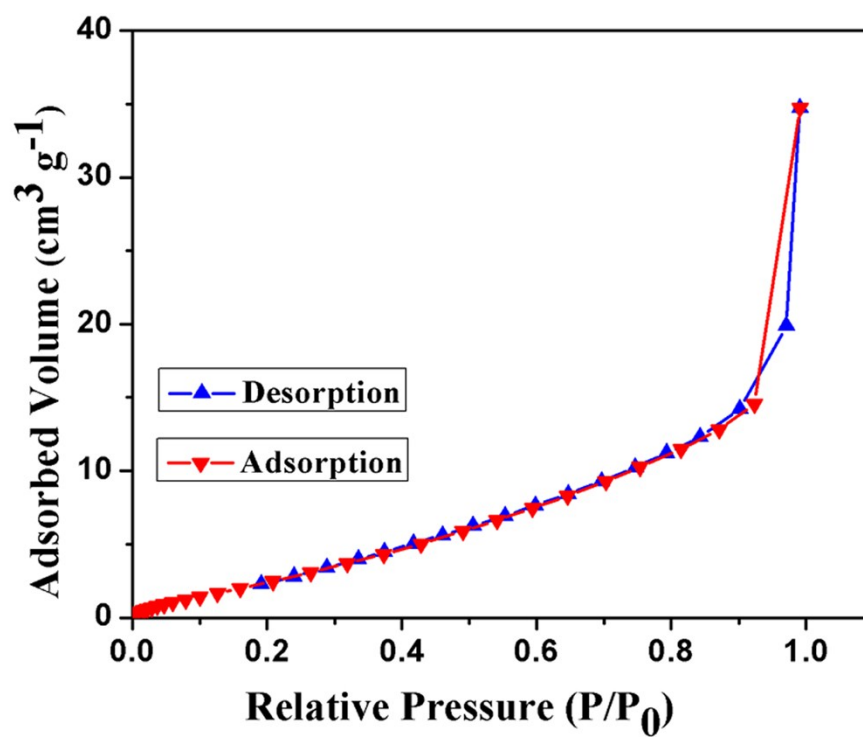

Fig. S2 N<sub>2</sub> adsorption/desorption isotherms of compound 1.

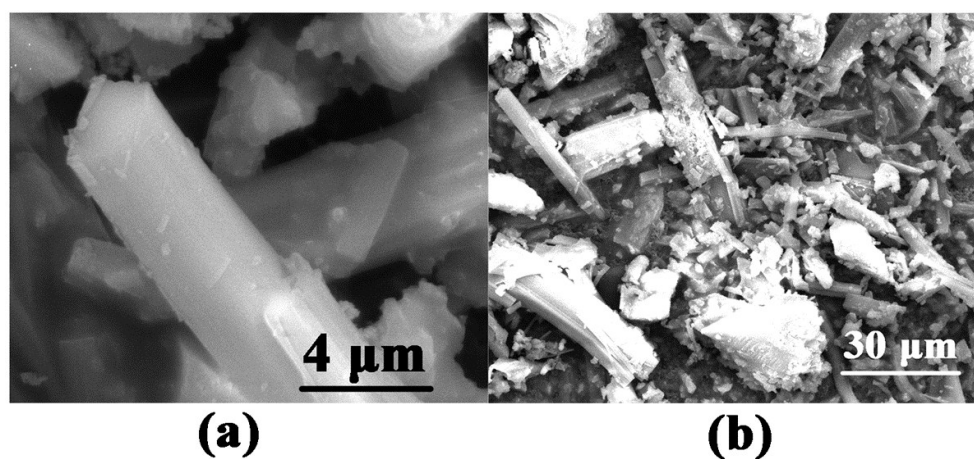

Fig. S3 SEM images of compound 1.

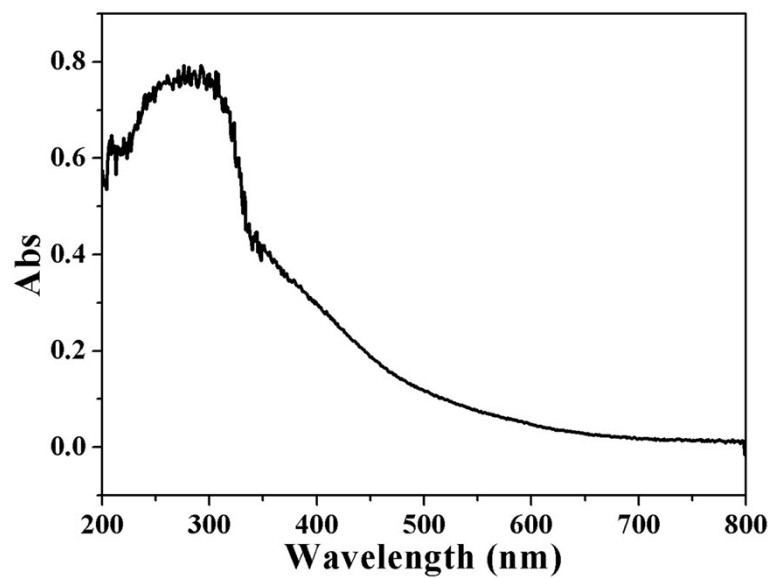

(a)

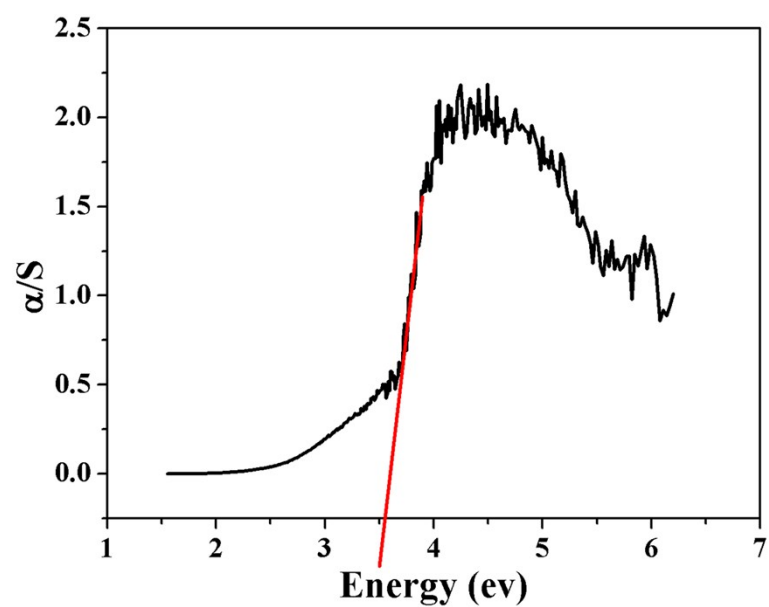

(b)

**Fig. S4** (a) UV-vis absorption spectrum in solid state. (b) Kubelka–Munk-transformed diffuse reflectance spectrum of compound **1**.

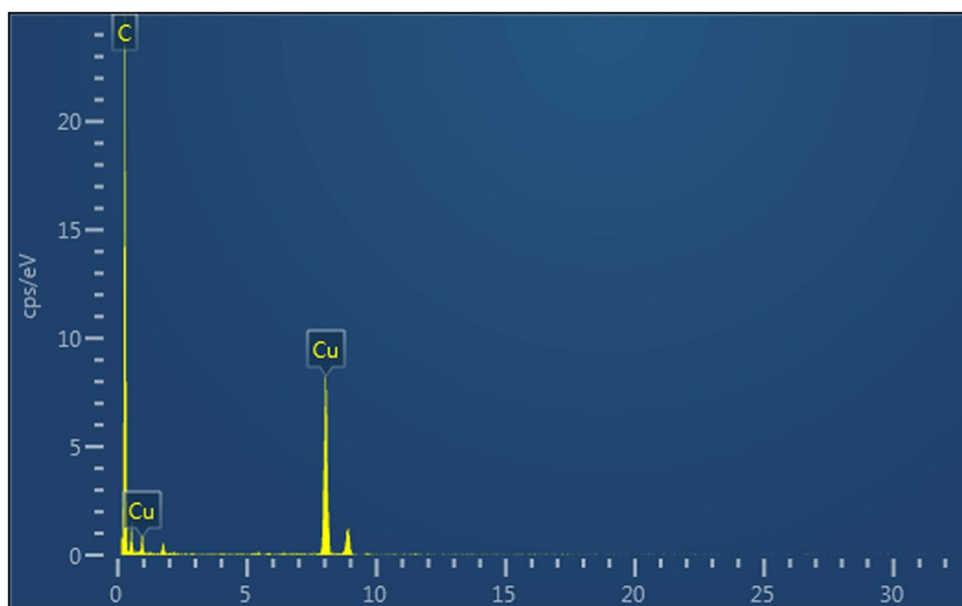

**Fig. S5** Energy dispersive X-ray spectrometer of R-C@800.

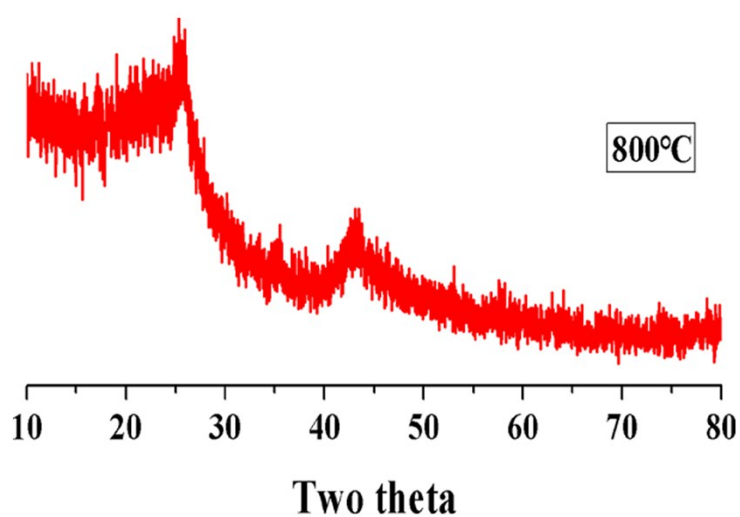

**Fig. S6** PXRD pattern of R-C@800.

**Table S1** Selected bond distances (Å) and angles (°) for **1**.

|              |           |              |           |
|--------------|-----------|--------------|-----------|
| Zn(1)-O(6)#1 | 1.910(4)  | Zn(1)-O(2)   | 1.950(4)  |
| Zn(1)-O(8)   | 1.969(5)  | Zn(1)-O(15)  | 1.981(14) |
| Zn(1)-O(15A) | 1.981(14) | Zn(2)-O(3)#2 | 2.011(4)  |
| Zn(2)-O(15A) | 2.049(18) | Zn(2)-O(1W)  | 2.049(4)  |
| Zn(2)-O(5)#1 | 2.067(4)  | Zn(2)-O(2W)  | 2.142(5)  |
| Zn(2)-O(15)  | 2.163(17) | Zn(2)-O(9)   | 2.207(4)  |

|                       |            |                           |           |
|-----------------------|------------|---------------------------|-----------|
| Zn(3A)-O(4)#2         | 1.819(5)   | Zn(3A)-O(1)               | 1.986(5)  |
| Zn(3A)-O(15)          | 2.011(13)  | Zn(3A)-O(4WA)             | 2.085(11) |
| Zn(3A)-O(11)#3        | 2.110(5)   | Zn(3B)-O(11)#3            | 1.936(5)  |
| Zn(3B)-O(15A)         | 1.997(14)  | Zn(3B)-O(4)#2             | 2.109(6)  |
| Zn(3B)-O(1)           | 2.175(5)   | Zn(3B)-O(10)#3            | 2.255(6)  |
| O(6)#1-Zn(1)-O(2)     | 112.42(18) | O(6)#1-Zn(1)-O(8)         | 113.0(2)  |
| O(2)-Zn(1)-O(8)       | 107.99(17) | O(6)#1-Zn(1)-O(15)        | 120.3(4)  |
| O(2)-Zn(1)-O(15)      | 107.1(5)   | O(8)-Zn(1)-O(15)          | 94.3(5)   |
| O(6)#1-Zn(1)-O(15A)   | 108.1(4)   | O(2)-Zn(1)-O(15A)         | 109.5(5)  |
| O(8)-Zn(1)-O(15A)     | 105.6(5)   | O(3)#2-Zn(2)-O(15A)       | 97.7(4)   |
| O(3)#2-Zn(2)-O(1W)    | 86.58(17)  | O(15A)-Zn(2)-O(1W)        | 173.8(4)  |
| O(3)#2-Zn(2)-O(5)#1   | 173.10(16) | O(1W)-Zn(2)-O(5)#1        | 87.28(18) |
| O(3)#2-Zn(2)-O(2W)    | 87.5(2)    | O(15A)-Zn(2)-O(2W)        | 83.7(5)   |
| O(1W)-Zn(2)-O(2W)     | 92.0(2)    | O(5)#1-Zn(2)-O(2W)        | 89.58(19) |
| O(3)#2-Zn(2)-O(15)    | 88.7(4)    | O(1W)-Zn(2)-O(15)         | 173.9(4)  |
| O(5)#1-Zn(2)-O(15)    | 97.6(4)    | O(2W)-Zn(2)-O(15)         | 91.8(5)   |
| O(3)#2-Zn(2)-O(9)     | 93.92(19)  | O(15A)-Zn(2)-O(9)         | 97.4(4)   |
| O(1W)-Zn(2)-O(9)      | 86.77(18)  | O(5)#1-Zn(2)-O(9)         | 88.88(17) |
| O(2W)-Zn(2)-O(9)      | 178.05(16) | O(15)-Zn(2)-O(9)          | 89.6(4)   |
| O(4)#2-Zn(3A)-O(1)    | 164.7(3)   | O(4)#2-Zn(3A)-O(15)       | 95.7(5)   |
| O(1)-Zn(3A)-O(15)     | 91.6(5)    | O(4)#2-Zn(3A)-<br>O(4WA)  | 84.7(3)   |
| O(1)-Zn(3A)-O(4WA)    | 81.4(3)    | O(15)-Zn(3A)-<br>O(4WA)   | 142.7(6)  |
| O(4)#2-Zn(3A)-O(11)#3 | 102.8(2)   | O(1)-Zn(3A)-O(11)#3       | 85.81(19) |
| O(15)-Zn(3A)-O(11)#3  | 116.5(6)   | O(4WA)-Zn(3A)-<br>O(11)#3 | 99.6(4)   |
| O(11)#3-Zn(3B)-O(15A) | 149.3(6)   | O(11)#3-Zn(3B)-<br>O(4)#2 | 98.9(2)   |

|                       |           |                            |          |
|-----------------------|-----------|----------------------------|----------|
| O(11)#3-Zn(3B)-O(1)   | 85.26(19) | O(15A)-Zn(3B)-O(1)         | 99.8(4)  |
| O(4)#2-Zn(3B)-O(1)    | 123.3(2)  | O(11)#3-Zn(3B)-<br>O(10)#3 | 62.5(2)  |
| O(4)#2-Zn(3B)-O(10)#3 | 131.3(2)  | O(1)-Zn(3B)-O(10)#3        | 100.8(2) |

Symmetry transformations used to generate equivalent atoms: #<sup>1</sup> x, y+1, z-1; #<sup>2</sup> x+1, y, z; #<sup>3</sup> x, y-1, z.

## References

1 L. J. Farrugia, *J. Appl. Cryst.*, 2012, **45**, 849-854.
